# Supplementary material for: Cannabinoid-Induced Stereoselective Inhibition of R-S-Oxazepam Glucuronidation: Cannabinoid–Oxazepam Drug Interactions
Source: MDPI journal article supplement (doi:10.3390/pharmaceutics16020243), 2024-02-07
Supplement: s1 [file s1]

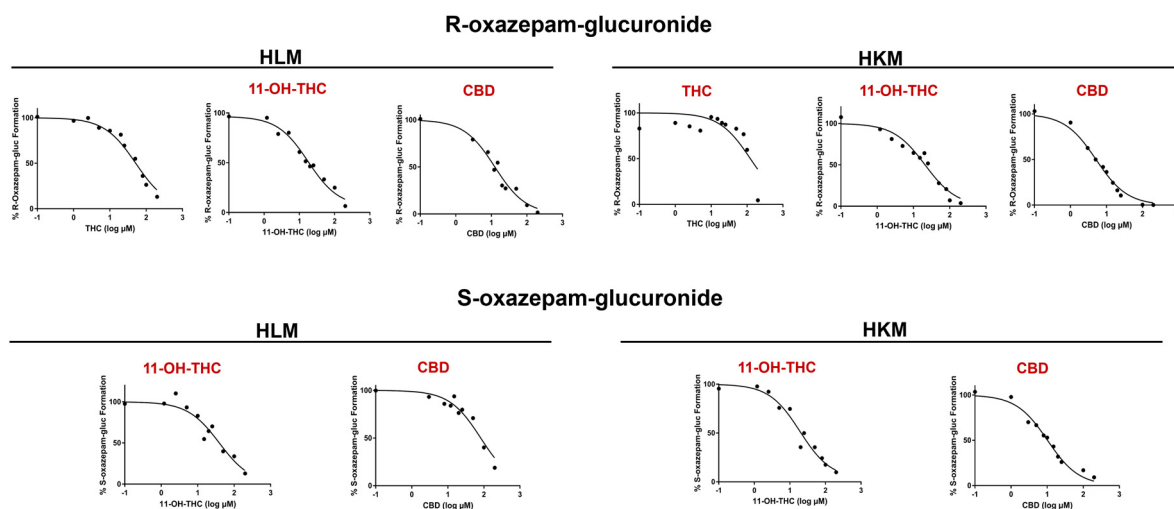

**Figure S1.** Representative  $IC_{50}$  curves for the inhibition of R- and S-oxazepam glucuronide formation by THC, 11-OH-THC, and CBD in HLM and HKM. R- and S-oxazepam glucuronide formation was measured using multiple concentrations of cannabinoids ranging from 0.1–200  $\mu$ M. Transformed log ( $\mu$ M) concentration of cannabinoids or metabolites are plotted against the % of R- and S-oxazepam glucuronide formation. As THC inhibited S-oxazepam glucuronide formation with an  $IC_{50} > 100$ , representative curves are not shown.
