# Supplementary material for: Cannabinoid-Induced Stereoselective Inhibition of R-S-Oxazepam Glucuronidation: Cannabinoid–Oxazepam Drug Interactions
Source: MDPI journal article supplement (doi:10.3390/pharmaceutics16020243), 2024-02-07
Supplement: s1 [file s1]

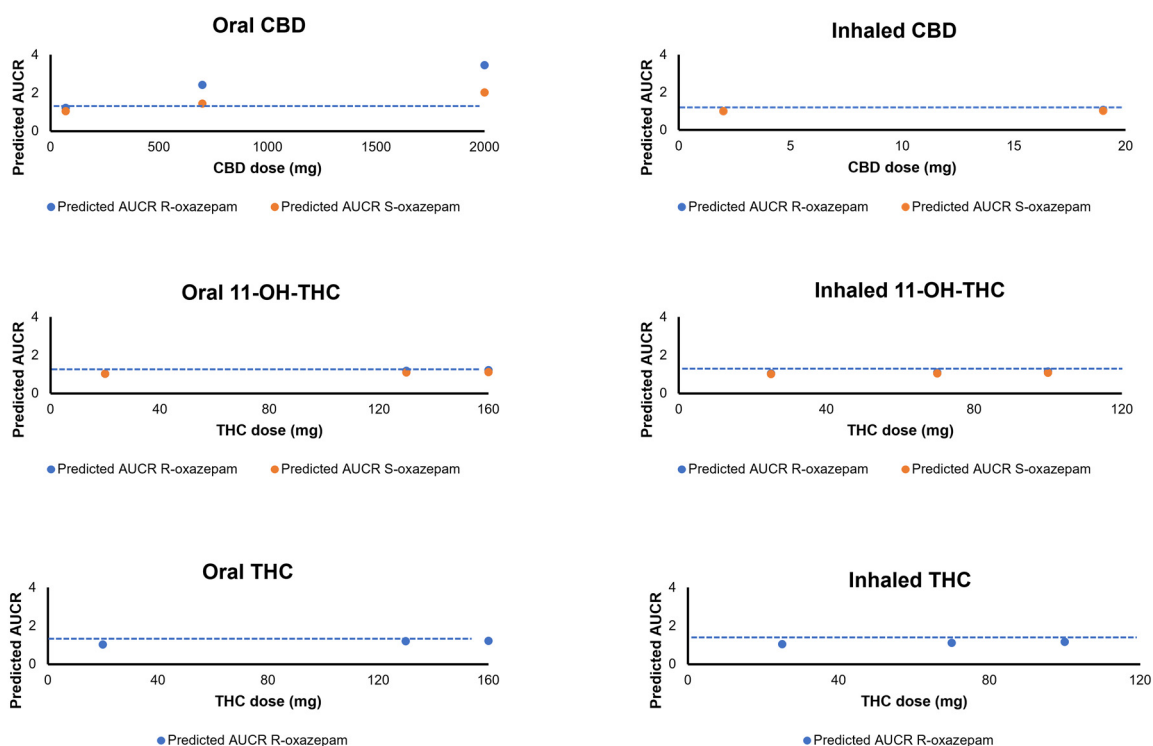

Figure S2: Graphical representation of predicted magnitudes of increase in R- (blue) and S-oxazepam (orange) exposure with and without cannabinoid coadministration. AUCRs were calculated based on oral and inhaled doses (low, average, and high) of CBD and THC [20,57]. The dotted line represents the  $\text{AUCR} \geq 1.25$  cut-off recommended by the FDA for a potential DDI [52].
